# 1 Assortative mating on ancestry-variant traits in admixed Latin American populations

2 Emily T. Norris<sup>1,2,3</sup>, Lavanya Rishishwar<sup>2,3</sup>, Lu Wang<sup>1,3</sup>, Andrew B. Conley<sup>2</sup>, Aroon T. Chande<sup>1,2,3</sup>, Adam M.

3 Dabrowski<sup>1</sup>, Augusto Valderrama-Aguirre<sup>3,4</sup>, I. King Jordan<sup>1,2,3,\*</sup>

4

5 <sup>1</sup>School of Biological Sciences, Georgia Institute of Technology, Atlanta, Georgia, USA

6 <sup>2</sup>IHRC-Georgia Tech Applied Bioinformatics Laboratory, Atlanta, Georgia, USA

7 <sup>3</sup>PanAmerican Bioinformatics Institute, Cali, Valle del Cauca, Colombia

8 <sup>4</sup>Biomedical Research Institute, Universidad Libre, Cali, Valle del Cauca, Colombia

9

10 ETN: etnorris@gatech.edu

11 LR: lrishishwar@ihrc.com

12 LW: lu.wang@gatech.edu

13 ABC: aconley@ihrc.com

14 ATC: arch@gatech.edu

15 AMD: adabrowski3@gatech.edu

16 AV: avalderr@hotmail.com

17 IKJ: king.jordan@biology.gatech.edu

18

19 \*Corresponding author

20 950 Atlantic Drive

21 Atlanta, GA 30332

22 404-385-2224

23 king.jordan@biology.gatech.edu

## 24 **Abstract**

### 25 **Background**

26 Assortative mating is a universal feature of human societies, and individuals from ethnically diverse  
27 populations are known to mate assortatively based on similarities in genetic ancestry. However, little is  
28 currently known regarding the exact phenotypic cues, or their underlying genetic architecture, which  
29 inform ancestry-based assortative mating.

### 30 **Results**

31 We developed a novel approach, using genome-wide analysis of ancestry-specific haplotypes, to evaluate  
32 ancestry-based assortative mating on traits whose expression varies among the three continental  
33 population groups – African, European, and Native American – that admixed to form modern Latin  
34 American populations. Application of this method to genome sequences sampled from Colombia, Mexico,  
35 Peru, and Puerto Rico revealed widespread ancestry-based assortative mating. We discovered a number  
36 of anthropometric traits (body mass, height, facial development and waist-hip ratio) and neurological  
37 attributes (educational attainment and schizophrenia) that serve as phenotypic cues for ancestry-based  
38 assortative mating. Major histocompatibility complex (MHC) loci show population-specific patterns of both  
39 assortative and disassortative mating in Latin America. Ancestry-based assortative mating in the  
40 populations analyzed here appears to be driven primarily by African ancestry.

### 41 **Conclusions**

42 This study serves as an example of how population genomic analyses can yield novel insights into human  
43 behavior.

44

45 **Keywords:** assortative mating, mate choice, genetic ancestry, admixture, population genomics, polygenic

46 phenotypes

47

## 48 Background

49 Mate choice is a fundamental dimension of human behavior with important implications for population  
50 genetic structure and evolution [1-3]. It is widely known that humans choose to mate assortatively rather  
51 than randomly. That is to say that humans, for the most part, tend to choose mates that are more similar  
52 to themselves than can be expected by chance. Historically, assortative mating was based largely on  
53 geography, whereby partners were chosen from a limited set of physically proximal individuals [4]. Over  
54 millennia, assortative mating within groups of geographically confined individuals contributed to genetic  
55 divergence between groups, and the establishment of distinct human populations, such as the major  
56 continental population groups recognized today [5-7].

57 However, the process of geographic isolation followed by population divergence that characterized human  
58 evolution has not been strictly linear. Ongoing human migrations have continuously brought previously  
59 isolated populations into contact; when this occurs, the potential exists for once isolated populations to  
60 admix, thereby forming novel population groups [8]. Perhaps the most precipitous example of this process  
61 occurred in the Americas, starting just over 500 years ago with the arrival of Columbus in the New World  
62 [9]. This major historical event quickly led to the co-localization of African, European and Native American  
63 populations that had been (mostly) physically isolated for tens of thousands of years [10]. As can be  
64 expected, the geographic reunification of these populations was accompanied, to some extent, by genetic  
65 admixture and the resulting formation of novel populations. This is particularly true for populations in Latin  
66 America, which often show high levels of three-way genetic admixture between continental population  
67 groups [11-15].

68 Nevertheless, modern admixed populations are still very much characterized by non-random assortative  
69 mating. Assortative mating in modern populations has been shown to rest on a variety of traits, including  
70 physical (stature and pigmentation) and neurological (cognition and personality) attributes. For example,

71 numerous studies have demonstrated an influence of similarities in height and body mass on mate choice  
72 [2, 16-18]. In addition, assortative mating has been observed for diverse neurological traits, such as  
73 educational attainment, introversion/extroversion and even neurotic tendencies [19-24]. Harder to classify  
74 traits related to personal achievement (income and occupational status) and culture (values and political  
75 leanings) also impact patterns of assortative mating [19, 25, 26]. Odor is one of the more interesting traits  
76 implicated in mate choice, and it has been linked to so-called disassortative (or negative assortative)  
77 mating, whereby less similar mates are preferred. Odor-based disassortative mating has been attributed  
78 to differences in genes of the major histocompatibility (MHC) locus, which functions in the immune system,  
79 based on the idea that combinations of divergent human leukocyte antigen (HLA) alleles provide a selective  
80 advantage via elevated host resistance to pathogens [27, 28].

81 Ancestry is a particularly important determinant of assortative mating in modern admixed populations [29,  
82 30]. Studies have shown that individuals in admixed Latin American populations tend to mate with partners  
83 that have similar ancestry profiles. For example, partners from both Mexican and Puerto Rican populations  
84 have significantly higher ancestry similarities than expected by chance [24, 31]. In addition, a number of  
85 traits that have been independently linked to assortative mating show ancestry-specific differences in their  
86 expression [32]. Accordingly, ancestry-based mate choice has recently been related to a limited number  
87 of physical (facial development) and immune-related (MHC loci) traits [24].

88 The studies that have uncovered the role of genetic ancestry in assortative mating among Latinos have  
89 relied on estimates of global ancestry fractions between mate pairs [24, 31]. Given the recent accumulation  
90 of numerous whole genome sequences from admixed Latin American populations – along with genome  
91 sequences from global reference populations [7] – it is now possible to characterize local genetic ancestry  
92 for individuals from admixed American populations [12, 33, 34]. In other words, the ancestral origins for  
93 specific chromosomal regions (haplotypes) can be assigned with high confidence for admixed individuals  
94 [35]. For the first time here, we sought to evaluate the impact of local ancestry on assortative mating in

95 admixed Latin American populations. Since the genetic variants that influence numerous phenotypes have  
96 been mapped to specific genomic regions, we reasoned that a focus on local ancestry could help to reveal  
97 the specific phenotypic drivers of ancestry-based assortative mating.

98 Our approach to this question entailed an integrated analysis of local genetic ancestry and the genetic  
99 architecture of a variety of human traits thought to be related to assortative mating. Assortative mating  
100 results in an excess of homozygosity, whereas disassortative mating yields excess heterozygosity. It follows  
101 that assortative (or disassortative) mating based on local ancestry would yield an excess (or deficit) of  
102 ancestry homozygosity at specific genetic loci. In other words, for a given population, a locus implicated in  
103 ancestry-based assortative mating would be more likely to have the same ancestry at both pairs of haploid  
104 chromosomes within individuals than expected by chance. We developed a test statistic – the assortative  
105 mating index (AMI) – that evaluates this prediction for individual gene loci, and we applied it to sets of  
106 genes that function together to encode polygenic phenotypes. We find evidence of substantial local  
107 ancestry-based assortative mating, and far less disassortative mating, for four admixed Latin American  
108 populations across a variety of anthropometric, neurological and immune-related phenotypes. Our  
109 approach also allowed us to assess the specific ancestry components that drive patterns of assortative and  
110 disassortative mating in these populations.

111

## 112 **Results**

### 113 **Global and local genetic ancestry in Latin America**

114 We compared whole genome sequences from four admixed Latin American populations, characterized as  
115 part of the 1000 Genomes Project (1KGP) [7] to genome sequences and whole genome genotypes from a  
116 panel of 34 global reference populations from Africa, Europe and the Americas (Table 1 and Additional file

117 1: Figure S1). The program ADMIXTURE [39] was used to infer the continental genetic ancestry fractions –  
118 African, European and Native American – for individuals from the four Latin American populations  
119 (Additional file 1: Figure S2). Distributions of individuals' continental ancestry fractions illustrate the  
120 distinct ancestry profiles of the four populations (Fig. 1). Puerto Rico and Colombia and show the highest  
121 European ancestry fractions along with the highest levels of three-way admixture. These two populations  
122 also have the highest African ancestry fractions; although, all four populations have relatively small  
123 fractions of African ancestry. Peru and Mexico show more exclusively Native American and European  
124 admixture, with Peru having by far the largest Native American ancestry fraction.

125 The program RFMix [35] was used to infer local African, European and Native American genetic ancestry  
126 for individuals from the four admixed Latin American populations analyzed here. RFMix uses global  
127 reference populations to perform chromosome painting, whereby the ancestral origins of specific  
128 haplotypes are characterized across the entire genome for admixed individuals. Only haplotypes with high  
129 confidence ancestry assignments ( $\geq 99\%$ ) were taken for subsequent analysis. Examples of local ancestry  
130 assignment chromosome paintings for representative admixed individuals from each population are shown  
131 in Additional file 1: Figure S3. The overall continental ancestry fractions for admixed genomes calculated  
132 by global and local ancestry analysis are highly correlated, and in fact virtually identical, across all individuals  
133 analyzed here, in support of the reliability of these approaches to ancestry assignment (Additional file 1:  
134 Figure S4).

135

### 136 **Assortative mating and local ancestry in Latin America**

137 We analyzed genome-wide patterns of local ancestry assignment in order to assess the evidence for  
138 assortative mating based on local ancestry in Latin America (Fig. 2a). For each individual, the ancestry  
139 assignments for pairs of haplotypes at any given gene were evaluated for homozygosity (*i.e.*, the same



140 ancestry on both haplotypes) or heterozygosity (*i.e.*, different ancestry on both haplotypes) (Fig 2b). For  
141 each gene, across all four populations, the observed values of ancestry homozygosity and heterozygosity  
142 were compared to the expected values in order to compute gene- and population-specific assortative  
143 mating index (AMI) values. AMI is computed as a log odds ratio as described in the Methods. The expected  
144 values of local ancestry homozygosity and heterozygosity used for the AMI calculations are based on a  
145 Hardy-Weinberg triallelic model with the three allele frequencies computed as the locus-specific ancestry  
146 fractions. High positive AMI values result from an excess of observed local ancestry homozygosity and are  
147 thereby taken to indicate assortative mating based on shared local genetic ancestry. Conversely, low  
148 negative AMI values indicate excess local ancestry heterozygosity and disassortative mating.

149 While we were interested in exploring the relationship between local genetic ancestry and assortative  
150 mating, we recognized that mate choice is based on phenotypes rather than genotypes *per se*. Since  
151 phenotypes are typically encoded by multiple genes, expressed in the context of their environment, we  
152 used data from genome-wide association studies (GWAS) to identify sets of genes that function together  
153 to encode polygenic phenotypes (Fig. 2c). We combined data from several GWAS database sources in order  
154 to curate a collection of 106 gene sets that have been linked to the polygenic genetic architecture of a  
155 variety of human traits. These gene sets range in size from 2 to 212 genes and include a total of 986 unique  
156 genes (Additional file 1: Figure S5). We focused on phenotypes that are known or expected to influence  
157 mate choice and thereby impact assortative mating patterns. These phenotypes fall into three broad  
158 categories: anthropometric traits (*e.g.*, body shape, stature and pigmentation), neurological traits (*e.g.*,  
159 cognition, personality and addiction) and immune response (HLA genes). Finally, we used a meta-analysis  
160 of the AMI values for the sets of genes that underlie each polygenic phenotype in order to evaluate the  
161 impact of local ancestry on assortative mating (Fig. 2d).

162 We compared the distributions of observed versus expected AMI values to assess the overall evidence for  
163 local ancestry-based assortative mating in Latin America. Expected AMI values were computed via

164 permutation analysis by randomly combining pairs of haplotypes into diploid individuals in order to  
165 approximate random mating. The distribution of the expected AMI values is narrow and centered around  
166 0, whereas the observed AMI values have a far broader distribution and tend to be positive (expected AMI  
167  $\mu=-0.01$ ,  $\sigma=0.03$ , observed AMI  $\mu=0.11$ ,  $\sigma=0.14$ ; Fig. 3a). When all four admixed Latin American populations  
168 are considered together, the mean observed AMI value is significantly greater than the expected mean AMI  
169 ( $t=18.14$ ,  $P=8.12e-56$ ). The same trend can be seen when all four populations are considered separately  
170 (Additional file 1: Figure S6). Mean observed AMI values vary substantially across populations, with Mexico  
171 showing the highest levels of local ancestry-based assortative mating and Puerto Rico showing the lowest  
172 (Fig. 3b). There is also substantial variation seen for the extent of assortative mating among the three  
173 broad functional categories of phenotypes (Fig. 3c). Local ancestry-based assortative mating is particularly  
174 variable for HLA genes, with high levels of assortative mating seen for Mexico and evidence for  
175 disassortative mating seen for Colombia and Puerto Rico. Anthropometric traits tend to show higher levels  
176 of local ancestry-based assortative mating across all four populations compared to neurological traits.

177 In addition to the permutation test that we used to compute expected AMI values based on randomly  
178 paired haplotypes, we also performed a simulation analysis using a population genetic model of assortative  
179 mating in order to validate the performance of the AMI test statistic (Additional file 1: Figure S7). We were  
180 particularly interested in exploring the potential effects of different ancestry proportions among the  
181 populations analyzed here, and different gene set sizes, on computed AMI values. The population genetic  
182 model that we used to simulate assortative mating combines Hardy-Weinberg genotype expectations with  
183 a single parameter  $\alpha$  that represents the fraction of the population that mates assortatively. Details of how  
184 this model was implemented to simulate AMI values for the four populations can be found in the Methods  
185 section. The population genetic simulation shows that our AMI test statistic is fairly sensitive to low values  
186 of the assortative mating parameter  $\alpha$ . We also show that AMI values are not biased in any particular  
187 direction based on the overall ancestry fractions observed for each population. For example, according to

188 the simulation, Colombia should have the highest overall AMI values, followed by Puerto Rico, Mexico and  
189 Peru. This order is completely different from what is seen for the observed AMI values, where Mexico  
190 shows the highest mean value, followed by Peru, Colombia and Puerto Rico (Fig. 3b). The population  
191 genetic simulation does show that the size of the gene set being analyzed influences the sensitivity of the  
192 AMI test statistic. Larger gene sets show greater evidence for assortative mating at the same  $\alpha$  parameter  
193 values compared with smaller gene sets.

194

### 195 **Local ancestry-based assortative mating for polygenic phenotypes**

196 When considered together, observed AMI levels are enriched for positive values compared to the expected  
197 values based on randomly paired haplotypes, indicative of an overall trend of assortative mating based on  
198 local ancestry in admixed Latin American populations (Fig. 3a and Additional file 1: Figure S6). We evaluated  
199 polygenic phenotypes individually to look for the strongest examples of traits linked to local ancestry-based  
200 assortative mating and to evaluate traits that show either similar or variable assortative mating trends  
201 across populations. We computed AMI values for 106 polygenic phenotypes across the four populations;  
202 the expected and observed AMI values for all traits are shown in Additional file 1: Figure S8. As can be seen  
203 for the overall patterns of assortative mating, individual polygenic phenotypes show more extreme positive  
204 (for most cases) and negative (in a few cases) AMI values in the four admixed Latin American populations  
205 than can be expected for randomly mating populations.

206 There are 15 polygenic phenotypes that have statistically significant AMI values, after correction for  
207 multiple tests, indicative of local ancestry-based assortative mating ( $q < 0.05$ ; Fig. 4a). The majority of the  
208 statistically significant cases of assortative mating are seen in the Mexican population (8 out of 15), and the  
209 anthropometric functional category is most commonly seen among the significant phenotypes (12 out of  
210 15). Height is the most commonly observed phenotype among the significant cases, appearing 6 times in

211 three out of the four populations analyzed here (Colombia, Mexico and Peru). Body mass index is the next  
212 most common phenotype, with four significant cases in two populations (Mexico and Peru). The only  
213 neurological traits that show significant evidence of assortative mating are schizophrenia (Mexico and Peru)  
214 and educational attainment (Mexico). Puerto Rico was the only population that did not show any individual  
215 phenotypes with significant evidence of assortative mating, consistent with its low overall AMI values (Fig.  
216 3b and Additional file 1: Figure S6). A list of these significant traits, including references to the literature  
217 where the trait single nucleotide polymorphism (SNP)-associations were originally reported, is provided in  
218 Additional file 1: Table S1.

219 In addition to evaluating individual phenotypes for statistically significant AMI values, we also looked for  
220 polygenic phenotypes that showed the most similar or dissimilar patterns of assortative mating across the  
221 four admixed Latin American populations. The top 20 phenotypes with the highest and lowest population  
222 variance are shown in Fig. 4b (all are statistically significant at  $q < 0.05$ ). The polygenic phenotypes with the  
223 most variance in population-specific AMI values show more functional diversity compared to the  
224 phenotypes with the strongest signals for assortative mating. All three functional categories are  
225 represented among the highly population variant phenotypes, and the highly variant phenotypes consist  
226 of both assortative and disassortative mating cases (specifically the HLA genes that are described in more  
227 detail below). Neurological phenotypes are particularly enriched among the variant cases, including  
228 temperament and several addiction-related phenotypes: opioid sensitivity, alcohol dependence and  
229 general addiction. Interestingly, all of the least variant phenotypes – height, waist-hip ratio and  
230 schizophrenia – are also found among the most significant cases of assortative mating, attesting to a  
231 pervasive role in ancestry-based assortative mating for these traits. A list of the population (in)variant  
232 traits, including references to the literature where the trait SNP-associations were originally reported, is  
233 provided in Additional file 1: Table S1.

234 Given the evidence of significant local ancestry-based assortative mating that we observed for a number of  
235 traits, we evaluated whether there were particular ancestry components that were most relevant to mate  
236 choice. In other words, we asked whether the excess counts of observed ancestry homozygosity or  
237 heterozygosity are linked to specific local ancestry assignments: African, European and/or Native American.  
238 For significant polygenic phenotype gene sets of interest, we computed the observed versus expected  
239 ancestry homozygosity for each ancestry separately across all genes in the set (Fig. 5). Height is an  
240 anthropometric trait for which Colombia, Mexico and Peru show significant evidence of assortative mating  
241 after correction for multiple tests ( $q < 0.05$ ; Fig 5a), and Puerto Rico shows nominally significant assortative  
242 mating for this same trait ( $P < 0.05$ ). In Colombia, Peru and Puerto Rico, assortative mating for this polygenic  
243 phenotype is driven by an excess of African homozygosity, whereas in Mexico there is a lack of African  
244 homozygosity. The neurological disease schizophrenia shows statistically significant assortative mating in  
245 Mexico and Peru ( $q < 0.05$ ), with marginally significant values in Colombia and Puerto Rico (Fig. 5b). Patterns  
246 of assortative mating for this trait in Mexico and Peru are driven mainly by European ancestry, whereas  
247 Colombia and Puerto Rico show an excess of African ancestry homozygosity for this same trait.

248 Both Colombia and Puerto Rico show disassortative mating patterns for all HLA loci (both class I and II  
249 genes) (Fig. 5c). The combined AMI values for the HLA loci are only marginally significant but they are  
250 among the lowest AMI values seen for any trait evaluated here (Additional file 1: Figure S8), and they are  
251 also highly variable among populations (Fig. 4b). HLA loci in Colombia and Puerto Rico show a distinct lack  
252 of ancestry homozygosity for almost all ancestry components (Fig. 5c). Mexico and Peru, on the other  
253 hand, have some evidence for assortative mating for the HLA loci; Mexico has the highest estimates of  
254 ancestry homozygosity at HLA loci for any of the four populations, and Peru has an excess of European and  
255 Native American ancestry homozygosity and a deficit of African heterozygosity for these genes. Similar  
256 results for two additional anthropometric phenotypes are shown in Additional file 1: Figure S9: body mass  
257 index and waist-to-hip ratio adjusted for body mass index. These phenotypes show assortative mating in

258 all four populations, with varying components of ancestral homozygosity driving the relationships. When  
259 these results are considered together, African ancestry consistently shows the strongest effect on driving  
260 assortative and disassortative mating in admixed Latin American populations (Fig. 5 and Additional file 1:  
261 Figure S9).

262 We further evaluated the extent to which specific ancestry components may drive assortative mating  
263 patterns among admixed individuals by evaluating the variance of the three continental ancestry  
264 components among individuals within each Latin American population. Assortative mating is known to  
265 increase population variance for traits that are involved in mate choice; thus, the ancestry components that  
266 drive assortative mating in a given population are expected to show higher overall variance among  
267 individual genomes. African ancestry fractions show the highest variation among individuals for all four  
268 populations (Fig. 6), consistent with the results seen for the five specific cases of assortative mating  
269 evaluated in Fig. 5 and Additional file 1: Figure S9.

270

## 271 Discussion

272 Assortative mating is a nearly universal human behavior, and scientists have long been fascinated by the  
273 subject [1, 3]. Studies of assortative mating in humans have most often entailed direct measurements of  
274 traits – such as physical stature, education and ethnicity – followed by correlation of trait values between  
275 partners. Decades of such studies have revealed numerous, widely varying traits that are implicated in  
276 mate choice and assortative mating. Studies of this kind typically make no assumptions regarding, nor have  
277 any knowledge of, the genetic heredity of the traits under consideration. Moreover, the extent to which  
278 the expression of these traits varies among human population groups has largely been ignored.

279 More recent studies of assortative mating, powered by advances in human genomics, have begun to  
280 explore the genetic architecture underlying the human traits that form the basis of mate choice [2, 21]. In  
281 addition, recent genomic analyses have underscored the extent to which human genetic ancestry  
282 influences assortative mating [24, 30, 31]. However, until this time, these two strands of inquiry have not  
283 been brought together. The approach that we developed for this study allowed us to directly assess the  
284 connection between local genetic ancestry – *i.e.*, ancestry assignments for specific genome regions or  
285 haplotypes – and the human traits that serve as cues for assortative mating.

286 Our approach relies on the well-established principle that assortative mating results in an excess of genetic  
287 homozygosity [29]. However, we do not analyze homozygosity of specific genetic variants *per se*, as is  
288 normally done, rather we evaluate excess homozygosity, or the lack thereof, for ancestry-specific  
289 haplotypes (Fig. 2b). By merging this approach with data on the genetic architecture of polygenic human  
290 phenotypes, we were able to uncover specific traits that inform ancestry-based assortative mating. This is  
291 because, when individuals exercise mate choice decisions based on ancestry, they must do so using  
292 phenotypic cues that are ancestry-associated. In other words, ancestry-based assortative mating is, by  
293 definition, predicated upon traits that vary in expression among human population groups. An obvious  
294 example of this is skin color [32], and studies have indeed shown skin color to be an important feature of  
295 assortative mating [42-45]. It follows that the assortative mating traits that our study uncovered in admixed  
296 Latin American populations must be both genetically heritable and variable among African, European and  
297 Native American population groups.

298 The anthropometric traits found in our study – body mass, height, waist-hip ratio, and facial development  
299 – are both heritable and known to vary among the continental population groups that admixed to form  
300 modern Latin American populations. This implies that the genetic variants that influence these traits should  
301 also vary among these populations. Accordingly, it is readily apparent that mate choice decisions based on  
302 these physical features could track local genetic ancestry. Interpretation of the neurological traits that

303 show evidence of local ancestry-based assortative mating – schizophrenia and educational attainment – is  
304 not quite as straightforward. For schizophrenia, it is far more likely that we are analyzing genetic loci  
305 associated with a spectrum of personality traits that influence assortative mating, as opposed to mate  
306 choice based on full-blown schizophrenia, and indeed personality traits are widely known to impact mate  
307 choice decisions [19, 22, 25]. In addition, since schizophrenia prevalence does not vary greatly world-wide  
308 [46], it is more likely that ancestry-based assortative mating for this trait is tracking an underlying  
309 endophenotype rather than the disease itself. While educational attainment outcomes are largely  
310 environmentally determined, recent large-scale GWAS studies have uncovered a substantial genetic  
311 component to this trait, which is distributed among scores of loci across the genome [47-50]. The  
312 population distribution of education associated variants is currently unknown, but our results suggest the  
313 possibility of ancestry-variation for some of them.

314 Mate choice based on divergent MHC loci, apparently driven by body odor preferences, is the best known  
315 example of human disassortative mating [28]. However, studies of this phenomenon have largely relied on  
316 ethnically homogenous cohorts. In one case where females were asked to select preferred MHC-mediated  
317 odors from males of a different ethnic group, they actually preferred odors of males with more similar MHC  
318 alleles [51]. Another study showed differences in MHC-dependent mate choice for human populations  
319 with distinct ancestry profiles [27]. Ours is the first study that addresses the role of ancestry in MHC-  
320 dependent mate choice in ethnically diverse admixed populations. Unexpectedly, we found very different  
321 results for MHC-dependent mate choice among the four Latin American populations that we studied. In  
322 fact, AMI values for the HLA loci are among the most population variable for any trait analyzed here (Fig.  
323 4b). Mexico and Peru show evidence of assortative mating at HLA loci, whereas Colombia and Puerto Rico  
324 show evidence for disassortative mating (Fig. 5c). Interestingly, disassortative mating for HLA loci in  
325 Colombia and Puerto Rico is largely driven by African ancestry, and these two populations have substantially



326 higher levels of African ancestry compared to Mexico and Peru. The population- and ancestry-specific  
327 dynamics of MHC-dependent mate choice revealed here underscore the complexity of this issue.

328 Assortative mating alone is not expected to change the frequencies of alleles, or ancestry fractions in the  
329 case of our study, within a population. Assortative mating does, however, change genotype frequencies,  
330 resulting in an excess of homozygous genotypes. Accordingly, ancestry-based assortative mating is  
331 expected to yield an excess of homozygosity for local ancestry assignments (*i.e.*, ancestry-specific  
332 haplotypes) (Fig. 2b). By increasing homozygosity in this way, assortative mating also increases the  
333 population genetic variance for the traits that influence mate choice. In other words, assortative mating  
334 will lead to more extreme, and less intermediate, phenotypes than expected by chance. This population  
335 genetic consequence of assortative mating allowed us to evaluate the extent to which specific continental  
336 ancestries drive mate choice decisions in admixed populations, since specific ancestry drivers of assortative  
337 mating are expected to have increased variance. We found that the fractions of African ancestry have the  
338 highest variance among individuals for all four populations, consistent with the idea that traits that are  
339 associated with African ancestry drive most of the local ancestry-based assortative mating seen in this study  
340 (Fig. 6).

341

## 342 Conclusions

343 The confluence of African, European and Native American populations that marked the conquest and  
344 colonization of the New World yielded modern Latin American populations that are characterized by three-  
345 way genetic admixture [11-15]. Nevertheless, mate choice in Latin America is far from random [24, 31].  
346 Indeed, our results underscore the prevalence of ancestry-based assortative mating in modern Latin  
347 American societies. The local ancestry approach that we developed provided new insight into this process

348 by allowing us to hone in on the phenotypic cues that underlie ancestry-based assortative mating. Our  
349 method also illuminates the specific ancestry components that drive assortative mating for different traits  
350 and makes predictions regarding traits that should vary among continental population groups.

351

## 352 **Methods**

### 353 **Whole genome sequences and genotypes**

354 Whole genome sequence data for the four admixed Latin American populations studied here were taken  
355 from the Phase 3 data release of the 1000 Genomes Project (1KGP) [7]. Whole genome sequence data and  
356 genotypes for the putative ancestral populations (Africa, Europe and the Americas) were taken from the  
357 1KGP, the Human Genome Diversity Project [6] (HGDP) and a previous study on Native American genetic  
358 ancestry [36].

359 Whole genome sequence data and genotypes were merged, sites common to all datasets were kept, and  
360 single nucleotide polymorphism (SNP) strand orientation was corrected as needed, using PLINK version 1.9  
361 [37]. The resulting dataset consisted of 1,645 individuals from 38 populations with variants characterized  
362 for 239,989 SNPs. The set of merged SNP genotypes was phased, using the program SHAPEIT version 2.r837  
363 [38], with the 1KGP haplotype reference panel. This phased set of SNP genotypes was used for local  
364 ancestry analysis. PLINK was used to further prune the phased SNPs for linkage, yielding a pruned dataset  
365 containing 58,898 linkage-independent SNPs. This pruned set of SNP genotypes was used for global  
366 ancestry analysis.

367

368

## 369 Global and local ancestry assignment

370 To infer continental (global) ancestry of the four admixed Latin American populations, ADMIXTURE [39]  
371 was run on the pruned SNP genotype dataset ( $n=58,898$ ). ADMIXTURE was run using a  $K=4$ , yielding African,  
372 European, Asian and Native American ancestry fractions of each admixed individual; the final Asian and  
373 Native American fractions were summed to determine the Native American fraction of each individual. For  
374 local ancestry analysis of the admixed Latin American populations, the program RFMix [35] version 1.5.4  
375 was run in the PopPhased mode with a minimum node size of 5 and the 'usereference-panels-in-EM' option  
376 with 2 EM iterations for each individual in the dataset using the phased SNP genotypes ( $n=239,989$ ).  
377 Continental African, European, and Native American populations were used as reference populations, and  
378 contiguous regions with the same ancestry assignment, *i.e.*, ancestry-specific haplotypes, were delineated  
379 where the RFMix ancestry assignment certainty was at least 99%.

380 Autosomal NCBI RefSeq coding genes were accessed from the UCSC Genome Browser and mapped to the  
381 ancestry-specific haplotypes characterized for each admixed Latin American individual. For each diploid  
382 genome analyzed here, individual genes can have 0, 1 or 2 ancestry assignments depending on the number  
383 of high confidence ancestry-specific haplotypes at that locus. Our assortative mating index (AMI, see  
384 below) can only be computed for genes that have 2 ancestry assignments in any given individual, *i.e.*, cases  
385 where the ancestry is assigned for both copies of the gene. Thus, for each Latin American population  $p$ ,  
386 the mean ( $\overline{x_p}$ ) and standard deviation ( $sd_p$ ) of the number of genes with 2 ancestry assignments were  
387 calculated and used to compute an ancestry genotype threshold for the inclusion of genes in subsequent  
388 analyses. Genes were used in subsequent assortative mating analyses only if they were present above the  
389 ancestry genotype threshold of  $\overline{x_p} - sd_p$ .

390

391

## 392 Gene sets for polygenic phenotypes

393 The polygenic genetic architectures of phenotypes that could be effected by assortative mating were  
394 characterized using a variety of studies taken from the NHGRI-EBI GWAS Catalog [40], the Genetic  
395 Investigation of ANthropometric Traits (GIANT) consortium  
396 ([http://portals.broadinstitute.org/collaboration/giant/index.php/GIANT\\_consortium](http://portals.broadinstitute.org/collaboration/giant/index.php/GIANT_consortium)), and PubMed  
397 literature sources.

398 For each polygenic phenotype, all SNPs previously implicated at genome-wide significance levels of  $P \leq 10^{-8}$   
399 were collected as the phenotype SNP set. The gene sets for the polygenic phenotypes were collected by  
400 directly mapping trait-associated SNPs to genes. SNPs were used to create a gene set only if the SNP fell  
401 directly within a gene and thus no intergenic SNPs were used in creating gene sets. Gene sets from the  
402 GWAS Catalog were mapped from SNPs using EBI's in-house pipeline. Sets from GIANT were mapped  
403 according to specifications of each individual paper. Gene sets from literature searching were mapped  
404 using NCBI's dbSNP. For each Latin American population, phenotype gene sets were filtered to only include  
405 genes that passed the ancestry genotype threshold, as described previously. Finally, the polygenic  
406 phenotype gene sets were filtered based on size, so that all polygenic phenotypes included two or more  
407 genes. The final data set contains gene sets for 106 polygenic phenotypes, hierarchically organized into  
408 three functional categories, including 986 unique genes (Additional file 1: Figure S5).

409

## 410 Assortative mating index (AMI)

411 To assess local ancestry-based assortative mating, we developed the assortative mating index (AMI), a log  
412 odds ratio test statistic that computes the relative local ancestry homozygosity compared to heterozygosity  
413 for any given gene. Ancestry homozygosity occurs when both genes in a genome have the same local

414 ancestry, whereas ancestry heterozygosity refers to a pair of genes in a genome with different local  
415 ancestry assignments. The assortative mating index (*AMI*) is calculated as:

$$416 \quad AMI = \ln \left( \frac{\frac{obs(hom)}{exp(hom)}}{\frac{obs(het)}{exp(het)}} \right)$$

417 where  $\frac{obs(hom)}{exp(hom)}$  is the ratio of the observed and expected local ancestry homozygous gene  
418 pairs and  $\frac{obs(het)}{exp(het)}$  is the ratio of the observed and expected local ancestry heterozygous gene  
419 pairs.

420 The observed values of local ancestry homozygous and heterozygous gene pairs are taken from the gene-  
421 to-ancestry mapping data for each gene in each population. The expected values of local ancestry  
422 homozygous and heterozygous gene pairs are calculated for each gene in a population using a triallelic  
423 Hardy-Weinberg (HW) model, in which the gene-specific local ancestry assignment fractions are taken as  
424 the three allele frequencies. For the African (*a*), European (*e*), and Native American (*n*) gene-specific local  
425 ancestry assignment fractions in a population, the HW expected genotype frequencies are:  $(a + e + n)^2$   
426 or  $a^2 + 2ae + e^2 + 2an + 2en + n^2$ . Accordingly, the expected frequency of homozygous pairs is  $a^2 +$   
427  $e^2 + n^2$  and the expected frequency of heterozygous pairs is  $2ae + 2an + 2en$ . For each gene, in each  
428 population, the expected homozygous and heterozygous frequencies are multiplied by the number of  
429 individuals with two ancestry assignments for that gene to yield the expected counts of gene pairs in each  
430 class.

431 For each polygenic phenotype, a meta-analysis of gene-specific *AMI* values was conducted to evaluate the  
432 effect of all of the genes involved in the phenotype on assortative mating, using the metafor [41] package  
433 in R. 95% confidence intervals for each gene, meta-gene *AMI* values, significance *P*-values, and false  
434 discovery rate *q*-values, were computed using the Mantel-Haenszel method under a fixed-effects model.

435

#### 436 **Permutation of random mating**

437 A standard permutation testing framework was adopted for the approximation of random mating in each  
438 of the four Latin American populations. Random mating was approximated by randomly combining pairs  
439 of individual phased haplotypes from a population to yield permuted diploid genotypes. Haploid  
440 chromosomes were permuted randomly within each population using the Fisher-Yates shuffle. After  
441 permutation of the chromosomes, per gene AMI values were re-calculated for all genes passing the  
442 population-specific ancestry genotyping thresholds. The permutations were completed 20 times, and the  
443 population-specific mean AMI values for each gene were taken as the permuted AMI for the gene. This  
444 mean permuted AMI per gene was used in AMI meta-analysis for each gene set to determine expected AMI  
445 values.

446

#### 447 **Population genetic simulation of assortative mating**

448 To validate the performance of the AMI test statistic, we adopted a population genetic model that simulates  
449 assortative mating in the four Latin American populations under Hardy-Weinberg equilibrium, with a  
450 fraction of the population mating assortatively. For each gene in a given population, the present-day local  
451 ancestry assignment fractions are used as the starting ancestral proportions: African =  $a$ , European =  $e$ ,  
452 Native American =  $n$ . Using a triallelic Hardy-Weinberg model, taking the ancestral proportions as the allele  
453 frequencies, the ancestry genotype frequencies for a given gene at the starting generation are calculated  
454 as:

$$455 \quad P_{aa} = a^2$$

$$456 \quad P_{ae} = 2ae$$

457  $P_{an} = 2an$

458  $P_{ee} = e^2$

459  $P_{en} = 2en$

460  $P_{nn} = n^2$

461 where  $P_{aa}$  = African-African genotype,  $P_{ae}$  = African-European genotype,  $P_{an}$  = African-Native American  
462 genotype,  $P_{ee}$  = European-European genotype,  $P_{en}$  = European-Native American genotype and  $P_{nn}$  = Native  
463 American-Native American genotype. Under the model, the fraction of the population that mates  
464 assortatively is denoted as  $\alpha$  and the fraction that mates randomly is  $1 - \alpha$ . Taking the current generation  
465 ancestry genotype frequencies, the subsequent generation's ancestry genotype frequencies are calculated  
466 using the formulae:

467  $P'_{aa} = (1 - \alpha) \times a^2 + \alpha \times (P_{aa} + 0.25 \times P_{ae} + 0.25 \times P_{an})$

468  $P'_{ae} = (1 - \alpha) \times 2ae + \alpha \times (0.5 \times P_{ae})$

469  $P'_{an} = (1 - \alpha) \times 2an + \alpha \times (0.5 \times P_{an})$

470  $P'_{ee} = (1 - \alpha) \times e^2 + \alpha \times (P_{ee} + 0.25 \times P_{ae} + 0.25 \times P_{en})$

471  $P'_{en} = (1 - \alpha) \times 2en + \alpha \times (0.5 \times P_{en})$

472  $P'_{nn} = (1 - \alpha) \times n^2 + \alpha \times (P_{nn} + 0.25 \times P_{an} + 0.25 \times P_{en})$

473 Ancestry genotypes in each population were simulated for 20 generations, with the assumption of a  
474 generation time of 25 years, accounting for 500 years of elapsed time during the conquest and colonization  
475 of the Americas. The final ancestry genotype frequencies after the 20 generations were used to calculate  
476 the simulated ancestry homozygosity and heterozygosity values. For each Latin American simulated  
477 population, random gene sets, ranging in size from 2 to 20, were created by subsampling genes in the

478 simulation. A meta-analysis AMI value and  $P$ -value for each gene set was calculated using the fixed-effects  
479 model of the Mantel-Haenszel method.

480

#### 481 Ancestry-specific drivers of assortative mating

482 For each significant polygenic phenotype of interest, we identified the ancestry component related to mate  
483 choice by calculating the ancestry homozygosity ( $AH_{phenotype}^{anc}$ ) for all genes for each ancestry at the given  
484 phenotype. The ancestry homozygosity was calculated as

$$485 \quad AH_{phenotype}^{anc} = \sum_{g \in \text{genes in the phenotype}} \left( \frac{obs_g^{anc} - exp_g^{anc}}{exp_g^{anc}} \right)$$

486 where  $anc$  is one of the three ancestries – African, European or Native American,  $g \in$   
487 *genes in the phenotype* are all of the genes involved in the polygenic *phenotype*,  $obs_g^{anc}$  is the number  
488 of observed homozygous genes for gene  $g$  coming from  $anc$ , and  $exp_g^{anc}$  is the number of expected  
489 homozygous genes for gene  $g$  coming from  $anc$  (as calculated using a triallelic Hardy-Weinberg model).

490

#### 491 Statistical significance testing

492 Significance testing for the difference between the observed and expected AMI distributions was  
493 completed using the t-test package in R. The metafor package, used for calculating the meta-analysis AMI  
494 values, also calculates a  $P$ -value and a false discovery rate  $q$ -value to correct for multiple statistical tests,  
495 which were used for identifying polygenic phenotypes that are significantly influenced by local ancestry-  
496 based assortative mating in each Latin American population. The variance of AMI values across the four  
497 populations for each phenotype was calculated as it is implemented in R and used for identifying  
498 phenotypes that had highly similar (minimal variance) or highly dissimilar (maximal variance) local ancestry-



499 based assortative mating patterns. The coefficient of variation was used to measure the inter-individual  
500 variance for each of the three continental ancestry components within the four admixed Latin American  
501 populations analyzed here.

502

## 503 **Declarations**

### 504 **Ethics approval and consent to participate**

505 The de-identified human genome sequence data analyzed here are made publicly available as part of the  
506 1000 Genomes Project and the Human Genome Diversity Project.

### 507 **Consent for publication**

508 Not applicable

### 509 **Availability of data and materials**

510 1000 Genomes Project data are available from <http://www.internationalgenome.org/data/>

511 Human Genome Diversity Project data are available from <http://www.hagsc.org/hgdp/>

512 Previously published Native American genotype data can be accessed from a data use agreement  
513 governed by the University of Antioquia as previously described [36].

### 514 **Competing interests**

515 The authors declare that they have no competing interests.

516

517

## 518 Funding

519 ETN, LR, ABC, ATC and IKJ were supported by the IHRC-Georgia Tech Applied Bioinformatics Laboratory  
520 (ABiL). LW and AMD were supported by the Georgia Tech Bioinformatics Graduate Program. AV was  
521 supported by Fulbright, Colombia.

## 522 Authors' contributions

523 ETN conducted all of the ancestry-based assortative mating analyses. LR performed the permutation and  
524 simulation analyses. LW participated in the assortative mating analysis for individual phenotypes. ABC  
525 performed the genetic ancestry analyses. ETN, ATC, AMD and AV curated the GWAS SNP associations and  
526 polygenic phenotype gene sets. ETN, LR, LW and ABC generated the manuscript figures. IKJ conceived of,  
527 designed and supervised the project. ETN, LR and IKJ wrote the manuscript. All authors read and approved  
528 the final manuscript.

529

## 530 Additional files

531 **Additional file 1: Figure S1.** Global locations of the populations analyzed in this study. **Figure S2.** Three-way  
532 continental genetic ancestry for the four admixed Latin American populations analyzed in this study. **Figure**  
533 **S3.** Local ancestry assignment with chromosome painting. **Figure S4.** Comparison of ancestry fractions  
534 estimated by ADMIXTURE (global ancestry) versus RFMix (local ancestry). **Figure S5.** Polygenic phenotypes  
535 taken from genome-wide association studies (GWAS). **Figure S6.** Distributions of observed (dark blue)  
536 versus expected (light blue) AMI values for the four admixed Latin American populations analyzed here.  
537 **Figure S7.** Simulation of the assortative mating index (AMI) test statistic under assortative mating. **Figure**  
538 **S8.** Assortative mating index (AMI) values for all phenotypes across all four populations analyzed here.

539 **Figure S9.** Individual examples of ancestry-based assortative mating. **Table S1.** References and values for  
540 phenotypes with significant AMI values and population variance.

541

## 542 References

- 543 1. Vandenburg SG: **Assortative mating, or who marries whom?** *Behav Genet* 1972, **2**:127-157.
- 544 2. Robinson MR, Kleinman A, Graff M, Vinkhuyzen AA, Couper D, Miller MB, Peyrot WJ, Abdellaoui  
545 A, Zietsch BP, Nolte IM: **Genetic evidence of assortative mating in humans.** *Nature Human*  
546 *Behaviour* 2017, **1**:0016.
- 547 3. Buss DM: **Human mate selection: Opposites are sometimes said to attract, but in fact we are**  
548 **likely to marry someone who is similar to us in almost every variable.** *American scientist* 1985,  
549 **73**:47-51.
- 550 4. Cavalli-Sforza LL, Menozzi P, Piazza A: *The history and geography of human genes.* Princeton:  
551 Princeton University Press; 1994.
- 552 5. Rosenberg NA, Pritchard JK, Weber JL, Cann HM, Kidd KK, Zhivotovsky LA, Feldman MW: **Genetic**  
553 **structure of human populations.** *Science* 2002, **298**:2381-2385.
- 554 6. Li JZ, Absher DM, Tang H, Southwick AM, Casto AM, Ramachandran S, Cann HM, Barsh GS,  
555 Feldman M, Cavalli-Sforza LL, Myers RM: **Worldwide human relationships inferred from**  
556 **genome-wide patterns of variation.** *Science* 2008, **319**:1100-1104.
- 557 7. Genomes Project C, Auton A, Brooks LD, Durbin RM, Garrison EP, Kang HM, Korbel JO, Marchini  
558 JL, McCarthy S, McVean GA, Abecasis GR: **A global reference for human genetic variation.**  
559 *Nature* 2015, **526**:68-74.
- 560 8. Hellenthal G, Busby GB, Band G, Wilson JF, Capelli C, Falush D, Myers S: **A genetic atlas of**  
561 **human admixture history.** *Science* 2014, **343**:747-751.
- 562 9. Mann CC: *1493: Uncovering the new world Columbus created.* New York: Vintage; 2011.
- 563 10. Jordan IK: **The Columbian Exchange as a source of adaptive introgression in human**  
564 **populations.** *Biol Direct* 2016, **11**:17.

- 565 11. Montinaro F, Busby GB, Pascali VL, Myers S, Hellenthal G, Capelli C: **Unravelling the hidden**  
566 **ancestry of American admixed populations.** *Nat Commun* 2015, **6**:6596.
- 567 12. Rishishwar L, Conley AB, Wigington CH, Wang L, Valderrama-Aguirre A, Jordan IK: **Ancestry,**  
568 **admixture and fitness in Colombian genomes.** *Sci Rep* 2015, **5**:12376.
- 569 13. Wang S, Ray N, Rojas W, Parra MV, Bedoya G, Gallo C, Poletti G, Mazzotti G, Hill K, Hurtado AM,  
570 et al: **Geographic patterns of genome admixture in Latin American Mestizos.** *PLoS Genet* 2008,  
571 **4**:e1000037.
- 572 14. Ruiz-Linares A, Adhikari K, Acuna-Alonzo V, Quinto-Sanchez M, Jaramillo C, Arias W, Fuentes M,  
573 Pizarro M, Everardo P, de Avila F, et al: **Admixture in Latin America: geographic structure,**  
574 **phenotypic diversity and self-perception of ancestry based on 7,342 individuals.** *PLoS Genet*  
575 2014, **10**:e1004572.
- 576 15. Bryc K, Velez C, Karafet T, Moreno-Estrada A, Reynolds A, Auton A, Hammer M, Bustamante CD,  
577 Ostrer H: **Colloquium paper: genome-wide patterns of population structure and admixture**  
578 **among Hispanic/Latino populations.** *Proc Natl Acad Sci U S A* 2010, **107 Suppl 2**:8954-8961.
- 579 16. Allison DB, Neale MC, Kezis MI, Alfonso VC, Heshka S, Heymsfield SB: **Assortative mating for**  
580 **relative weight: genetic implications.** *Behav Genet* 1996, **26**:103-111.
- 581 17. Silventoinen K, Kaprio J, Lahelma E, Viken RJ, Rose RJ: **Assortative mating by body height and**  
582 **BMI: Finnish twins and their spouses.** *Am J Hum Biol* 2003, **15**:620-627.
- 583 18. Stulp G, Simons MJ, Grasman S, Pollet TV: **Assortative mating for human height: A meta-**  
584 **analysis.** *Am J Hum Biol* 2017, **29**.
- 585 19. Merikangas KR: **Assortative mating for psychiatric disorders and psychological traits.** *Arch Gen*  
586 *Psychiatry* 1982, **39**:1173-1180.
- 587 20. Mare RD: **Five decades of educational assortative mating.** *American sociological review*  
588 1991:15-32.

- 589 21. Domingue BW, Fletcher J, Conley D, Boardman JD: **Genetic and educational assortative mating**  
590 **among US adults.** *Proc Natl Acad Sci U S A* 2014, **111**:7996-8000.
- 591 22. Hur YM: **Assortive mating for personalty traits, educational level, religious affiliation, height,**  
592 **weight, adn body mass index in parents of Korean twin sample.** *Twin Res* 2003, **6**:467-470.
- 593 23. Salces I, Rebato E, Susanne C: **Evidence of phenotypic and social assortative mating for**  
594 **anthropometric and physiological traits in couples from the Basque country (Spain).** *J Biosoc*  
595 *Sci* 2004, **36**:235-250.
- 596 24. Zou JY, Park DS, Burchard EG, Torgerson DG, Pino-Yanes M, Song YS, Sankararaman S, Halperin  
597 E, Zaitlen N: **Genetic and socioeconomic study of mate choice in Latinos reveals novel**  
598 **assortment patterns.** *Proc Natl Acad Sci U S A* 2015, **112**:13621-13626.
- 599 25. Kandler C, Bleidorn W, Riemann R: **Left or right? Sources of political orientation: the roles of**  
600 **genetic factors, cultural transmission, assortative mating, and personality.** *J Pers Soc Psychol*  
601 2012, **102**:633-645.
- 602 26. Kalmijn M: **Assortative mating by cultural and economic occupational status.** *American Journal*  
603 *of Sociology* 1994, **100**:422-452.
- 604 27. Chaix R, Cao C, Donnelly P: **Is mate choice in humans MHC-dependent?** *PLoS Genet* 2008,  
605 **4**:e1000184.
- 606 28. Wedekind C, Seebeck T, Bettens F, Paepke AJ: **MHC-dependent mate preferences in humans.**  
607 *Proc Biol Sci* 1995, **260**:245-249.
- 608 29. Sebro R, Hoffman TJ, Lange C, Rogus JJ, Risch NJ: **Testing for non-random mating: evidence for**  
609 **ancestry-related assortative mating in the Framingham heart study.** *Genet Epidemiol* 2010,  
610 **34**:674-679.

- 611 30. Zaitlen N, Huntsman S, Hu D, Spear M, Eng C, Oh SS, White MJ, Mak A, Davis A, Meade K, et al:  
612 **The Effects of Migration and Assortative Mating on Admixture Linkage Disequilibrium.**  
613 *Genetics* 2017, **205**:375-383.
- 614 31. Risch N, Choudhry S, Via M, Basu A, Sebro R, Eng C, Beckman K, Thyne S, Chapela R, Rodriguez-  
615 Santana JR, et al: **Ancestry-related assortative mating in Latino populations.** *Genome Biol* 2009,  
616 **10**:R132.
- 617 32. Hancock AM, Witonsky DB, Alkorta-Aranburu G, Beall CM, Gebremedhin A, Sukernik R,  
618 Utermann G, Pritchard JK, Coop G, Di Rienzo A: **Adaptations to climate-mediated selective**  
619 **pressures in humans.** *PLoS Genet* 2011, **7**:e1001375.
- 620 33. Homburger JR, Moreno-Estrada A, Gignoux CR, Nelson D, Sanchez E, Ortiz-Tello P, Pons-Estel BA,  
621 Acevedo-Vasquez E, Miranda P, Langefeld CD, et al: **Genomic Insights into the Ancestry and**  
622 **Demographic History of South America.** *PLoS Genet* 2015, **11**:e1005602.
- 623 34. Moreno-Estrada A, Gravel S, Zakharia F, McCauley JL, Byrnes JK, Gignoux CR, Ortiz-Tello PA,  
624 Martinez RJ, Hedges DJ, Morris RW, et al: **Reconstructing the population genetic history of the**  
625 **Caribbean.** *PLoS Genet* 2013, **9**:e1003925.
- 626 35. Maples BK, Gravel S, Kenny EE, Bustamante CD: **RFMix: a discriminative modeling approach for**  
627 **rapid and robust local-ancestry inference.** *Am J Hum Genet* 2013, **93**:278-288.
- 628 36. Reich D, Patterson N, Campbell D, Tandon A, Mazieres S, Ray N, Parra MV, Rojas W, Duque C,  
629 Mesa N, et al: **Reconstructing Native American population history.** *Nature* 2012, **488**:370-374.
- 630 37. Chang CC, Chow CC, Tellier LC, Vattikuti S, Purcell SM, Lee JJ: **Second-generation PLINK: rising to**  
631 **the challenge of larger and richer datasets.** *Gigascience* 2015, **4**:7.
- 632 38. Delaneau O, Zagury JF, Marchini J: **Improved whole-chromosome phasing for disease and**  
633 **population genetic studies.** *Nat Methods* 2013, **10**:5-6.

- 634 39. Alexander DH, Novembre J, Lange K: **Fast model-based estimation of ancestry in unrelated**  
635 **individuals.** *Genome Res* 2009, **19**:1655-1664.
- 636 40. MacArthur J, Bowler E, Cerezo M, Gil L, Hall P, Hastings E, Junkins H, McMahon A, Milano A,  
637 Morales J, et al: **The new NHGRI-EBI Catalog of published genome-wide association studies**  
638 **(GWAS Catalog).** *Nucleic Acids Res* 2017, **45**:D896-D901.
- 639 41. Viechtbauer W: **Conducting meta-analyses in R with the metafor package.** *Journal of Statistical*  
640 *Software* 2010, **36**:1-48.
- 641 42. Procidano ME, Rogler LH: **Homogamous assortative mating among Puerto Rican families:**  
642 **intergenerational processes and the migration experience.** *Behav Genet* 1989, **19**:343-354.
- 643 43. Trachtenberg A, Stark AE, Salzano FM, Da Rocha FJ: **Canonical correlation analysis of assortative**  
644 **mating in two groups of Brazilians.** *J Biosoc Sci* 1985, **17**:389-403.
- 645 44. Malina RM, Selby HA, Buschang PH, Aronson WL, Little BB: **Assortative mating for phenotypic**  
646 **characteristics in a Zapotec community in Oaxaca, Mexico.** *J Biosoc Sci* 1983, **15**:273-280.
- 647 45. Frisancho AR, Wainwright R, Way A: **Heritability and components of phenotypic expression in**  
648 **skin reflectance of Mestizos from the Peruvian lowlands.** *Am J Phys Anthropol* 1981, **55**:203-  
649 208.
- 650 46. Saha S, Chant D, Welham J, McGrath J: **A systematic review of the prevalence of schizophrenia.**  
651 *PLoS Med* 2005, **2**:e141.
- 652 47. Davies G, Marioni RE, Liewald DC, Hill WD, Hagenaars SP, Harris SE, Ritchie SJ, Luciano M, Fawns-  
653 Ritchie C, Lyall D, et al: **Genome-wide association study of cognitive functions and educational**  
654 **attainment in UK Biobank (N=112 151).** *Mol Psychiatry* 2016, **21**:758-767.
- 655 48. Okbay A, Beauchamp JP, Fontana MA, Lee JJ, Pers TH, Rietveld CA, Turley P, Chen GB, Emilsson  
656 V, Meddens SF, et al: **Genome-wide association study identifies 74 loci associated with**  
657 **educational attainment.** *Nature* 2016, **533**:539-542.



- 658 49. Rietveld CA, Esko T, Davies G, Pers TH, Turley P, Benjamin B, Chabris CF, Emilsson V, Johnson  
659 AD, Lee JJ, et al: **Common genetic variants associated with cognitive performance identified**  
660 **using the proxy-phenotype method.** *Proc Natl Acad Sci U S A* 2014, **111**:13790-13794.
- 661 50. Rietveld CA, Medland SE, Derringer J, Yang J, Esko T, Martin NW, Westra HJ, Shakhbazov K,  
662 Abdellaoui A, Agrawal A, et al: **GWAS of 126,559 individuals identifies genetic variants**  
663 **associated with educational attainment.** *Science* 2013, **340**:1467-1471.
- 664 51. Jacob S, McClintock MK, Zelano B, Ober C: **Paternally inherited HLA alleles are associated with**  
665 **women's choice of male odor.** *Nat Genet* 2002, **30**:175-179.
- 666

**Table 1. Human populations analyzed in this study.** Populations are organized into continental groups, for both ancestral and admixed Latin American populations, and the number of individuals in each population and group is shown.

|                          | Dataset <sup>1</sup> | Geographical Source                     | Short | <i>n</i> |                                  | Dataset <sup>1</sup> | Geographical Source    | <i>n</i> |
|--------------------------|----------------------|-----------------------------------------|-------|----------|----------------------------------|----------------------|------------------------|----------|
| Africa ( <i>n</i> =547)  | 1KGP                 | Esan in Nigeria                         | ESN   | 99       | Native American ( <i>n</i> =280) | HGDP                 | Pima in Mexico         | 14       |
|                          | 1KGP                 | Gambian in Western Division, The Gambia | GWD   | 113      |                                  | HGDP                 | Maya in Mexico         | 21       |
|                          | 1KGP                 | Luhya in Webuye, Kenya                  | LWK   | 99       |                                  | Reich et al          | Tepehuano in Mexico    | 25       |
|                          | 1KGP                 | Mende in Sierra Leone                   | MSL   | 85       |                                  | Reich et al          | Mixtec in Mexico       | 5        |
|                          | 1KGP                 | Yoruba in Ibadan, Nigeria               | YRI   | 108      |                                  | Reich et al          | Mixe in Mexico         | 17       |
|                          | HGDP                 | Mandenka                                |       | 22       |                                  | Reich et al          | Zapotec in Mexico      | 43       |
|                          | HGDP                 | Yoruba                                  |       | 21       |                                  | Reich et al          | Kaqchikel in Guatemala | 13       |
| Europe ( <i>n</i> =471)  | 1KGP                 | Finnish in Finland                      | FIN   | 99       |                                  | Reich et al          | Kogi in Colombia       | 4        |
|                          | 1KGP                 | British in England & Scotland           | GBR   | 90       |                                  | Reich et al          | Waunana in Colombia    | 3        |
|                          | 1KGP                 | Iberian populations in Spain            | IBS   | 107      |                                  | Reich et al          | Embera in Colombia     | 5        |
|                          | 1KGP                 | Toscani in Italy                        | TSI   | 107      |                                  | Reich et al          | Guahibo in Colombia    | 6        |
|                          | HGDP                 | Russian                                 |       | 25       |                                  | Reich et al          | Piapoco in Colombia    | 7        |
|                          | HGDP                 | Orcadian                                |       | 15       |                                  | Reich et al          | Inga in Colombia       | 9        |
|                          | HGDP                 | French                                  |       | 28       |                                  | Reich et al          | Wayuu in Colombia      | 11       |
| Admixed ( <i>n</i> =347) | 1KGP                 | Colombian in Medellin, Colombia         | CLM   | 94       |                                  | HGDP                 | Karitiana in Brazil    | 14       |
|                          | 1KGP                 | Peruvian in Lima, Peru                  | PEL   | 85       |                                  | HGDP                 | Suruí in Brazil        | 8        |
|                          | 1KGP                 | Mexican Ancestry in LA, California      | MXL   | 64       |                                  | Reich et al          | Ticuna in Brazil       | 6        |
|                          | 1KGP                 | Puerto Rican in Puerto Rico             | PUR   | 104      |                                  | Reich et al          | Quechua in Peru        | 40       |
|                          |                      |                                         |       |          |                                  | Reich et al          | Aymara in Bolivia      | 23       |
|                          |                      |                                         |       |          |                                  | Reich et al          | Guarani in Paraguay    | 6        |

<sup>1</sup> 1KG = 1000 Genomes Project; HGDP = Human Genome Diversity Panel; Reich et al<sup>47</sup>

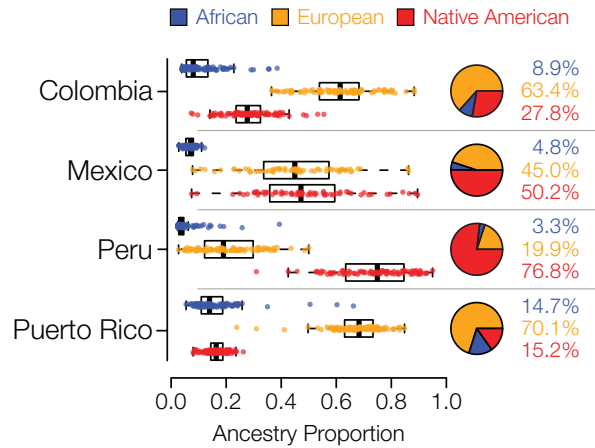

**Figure 1. Genetic ancestry proportions for the admixed Latin American populations studied here.** For each population, distributions and average values are shown for African (blue), European (orange) and Native American (red) ancestry.

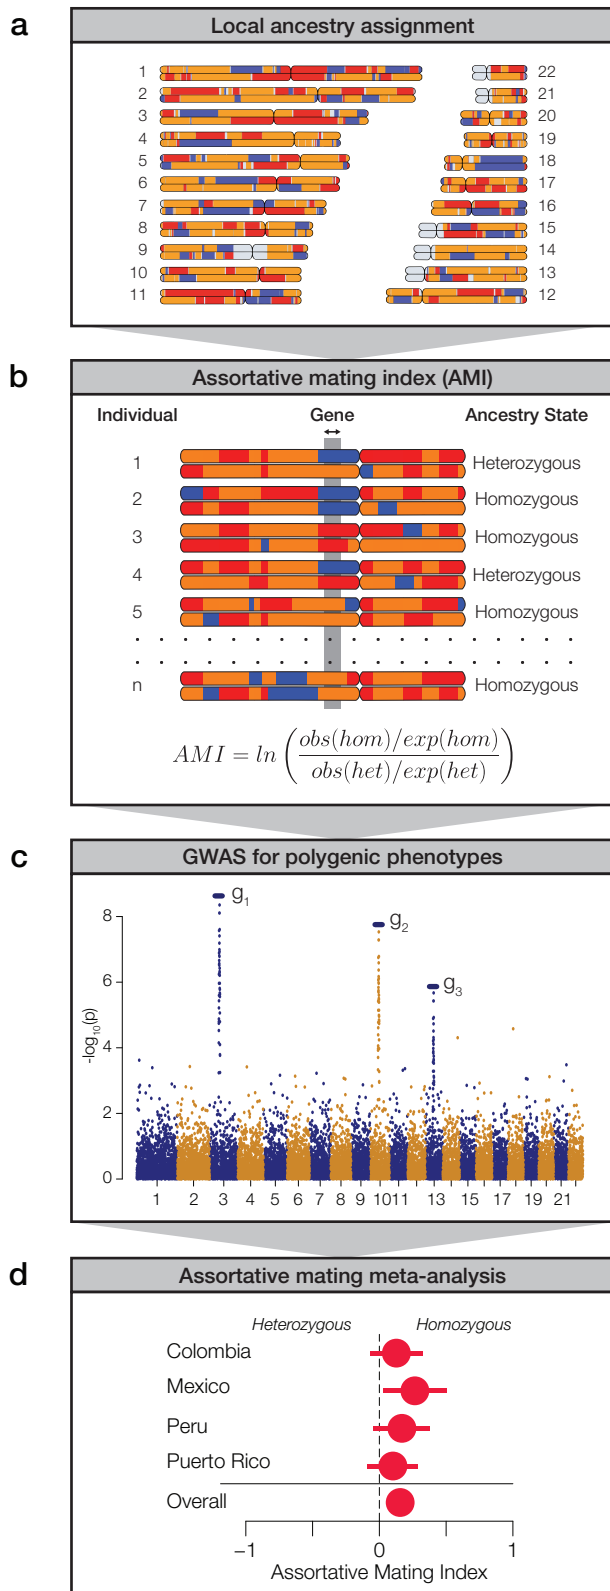

**Figure 2. Approach used to measure assortative mating on local ancestry.** (a) Local ancestry is assigned for specific haplotypes across the genome: African (blue), European (orange), and Native American (red). (b) Within individual genomes, genes are characterized as homozygous or heterozygous for local ancestry. For any given population, at each gene locus, the assortative mating index (AMI) is computed from the observed and expected counts of homozygous and heterozygous gene pairs. (c) Data from genome-wide association studies (GWAS) are used to evaluate polygenic phenotypes. (d) Meta-analysis of AMI values is used to evaluate the significance of ancestry-based assortative mating for polygenic phenotypes.

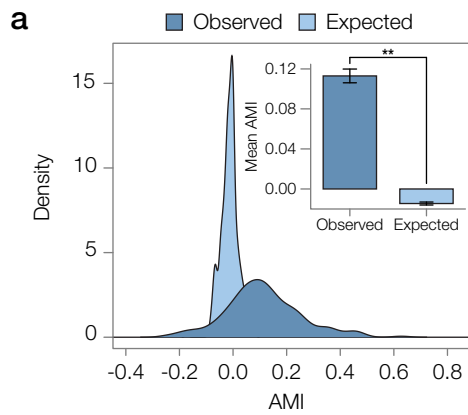

**Figure 3. Overview of ancestry-based assortative mating in the four admixed Latin American populations analyzed here. (a)** Distributions of observed and expected AMI values for all four populations. Inset: Mean observed and expected AMI values ( $\pm$ se) for all four populations. Significance between mean observed and expected AMI values ( $P=8.12e-56$ ) is indicated by two asterisks. **(b)** Observed and expected average AMI values ( $\pm$ se) across all polygenic phenotype gene sets are shown for each population. **(c)** Average AMI values ( $\pm$ se) for each population are shown for the three main phenotype functional categories characterized here: anthropometric, neurological, and human leukocyte antigen (HLA) genes.

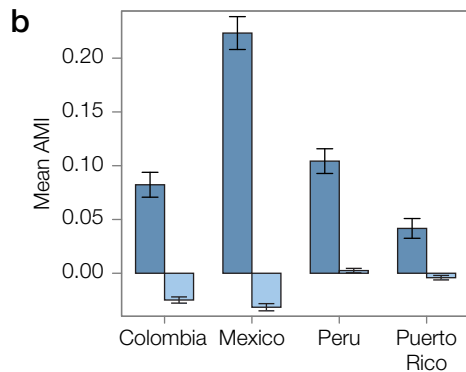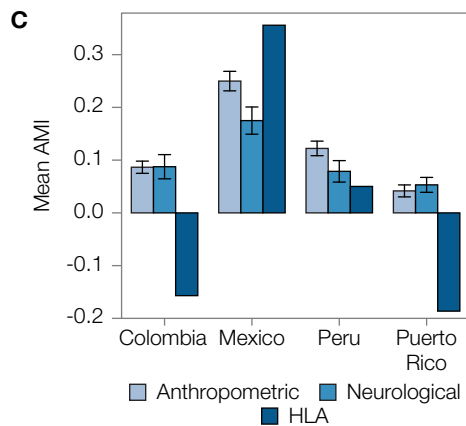

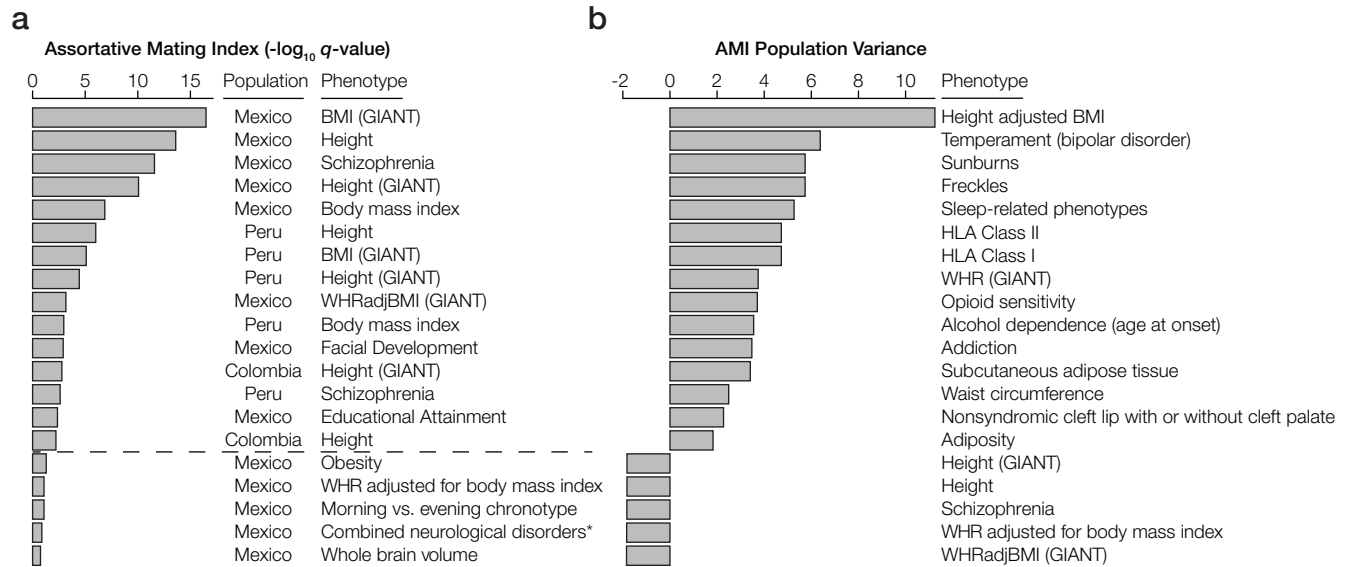

**Figure 4. Phenotypes with statistically significant patterns of assortative mating within and among populations.** (a) The top 20 phenotypes with the highest, and most statistically significant, assortative mating values (AMI) seen within any individual population. All AMI values shown are significant at  $P < 0.05$ , and the dashed line corresponds to a false discovery rate  $q\text{-value}$  cutoff of 0.05. (b) The top 20 phenotypes with the highest or lowest, and most statistically significant, AMI variance levels across populations. Across population variance levels are normalized using the average AMI population variance level for all phenotypes. All AMI variance levels shown are significant at  $q < 0.05$ . The highest variance (most dissimilar patterns) of the AMI are at the top, while the lowest variance (most similar patterns) of AMI are at the bottom.

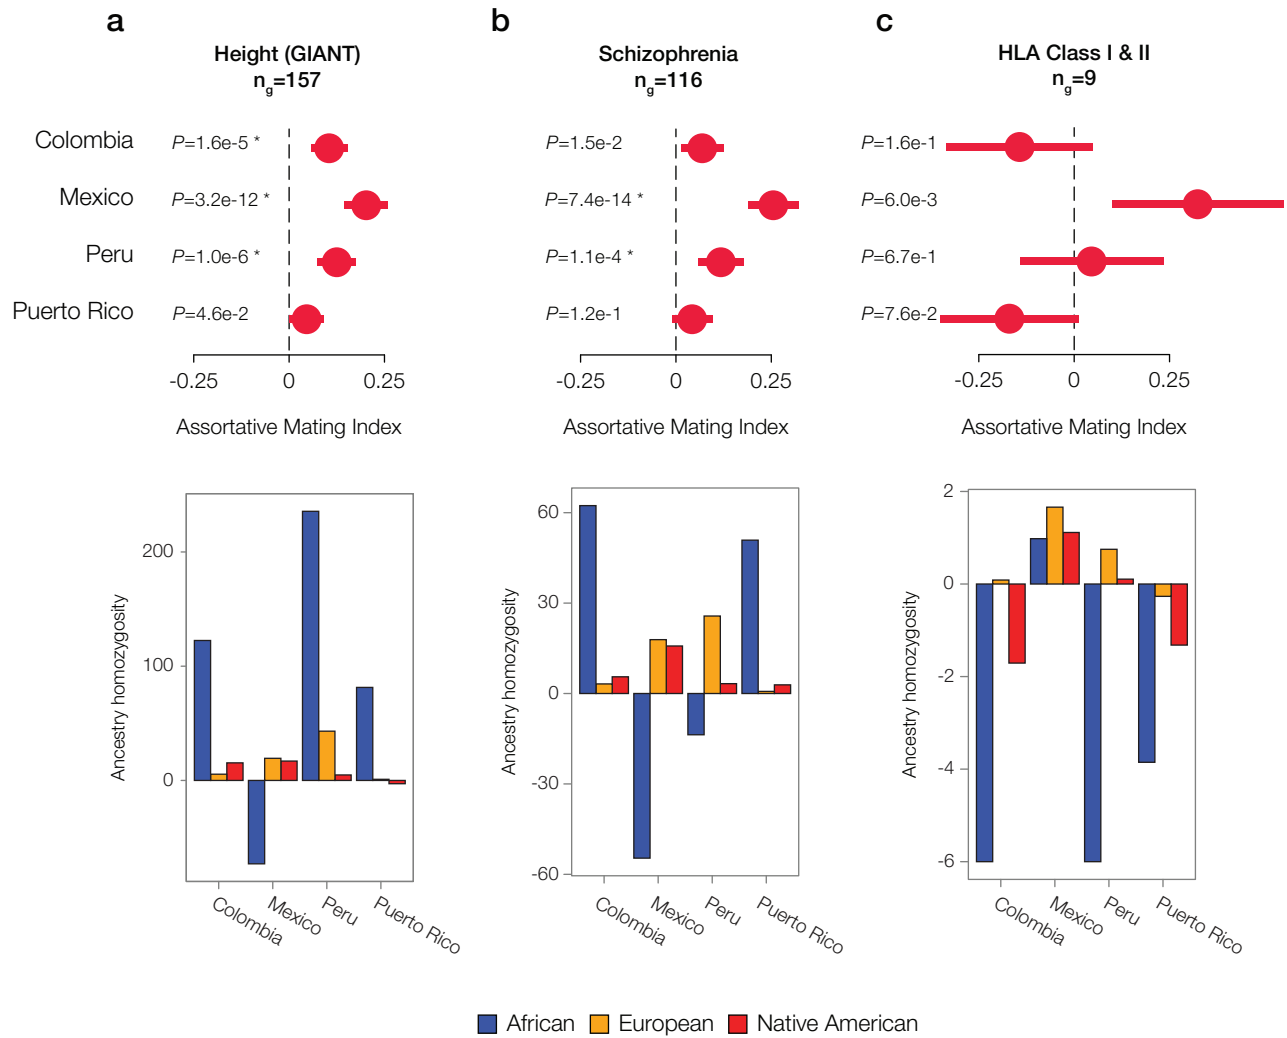

**Figure 5. Individual examples of ancestry-based assortative and disassortative mating.** Results of meta-analysis of (dis)assortative mating on polygenic phenotypes along with their ancestry drivers are shown for **(a)** an anthropometric trait: height, **(b)** a neurological trait: schizophrenia, and **(c)** the immune-related HLA class I and II genes. The meta-analysis plots show pooled AMI odds ratio values along with their 95% CIs and P-values. Stars indicate false discovery rate  $q$ -values  $< 0.05$ . The ancestry driver plots show the extent to which individual ancestry components – African (blue), European (orange), and Native American (red) – have an excess ( $> 0$ ) or a deficit ( $< 0$ ) of homozygosity.

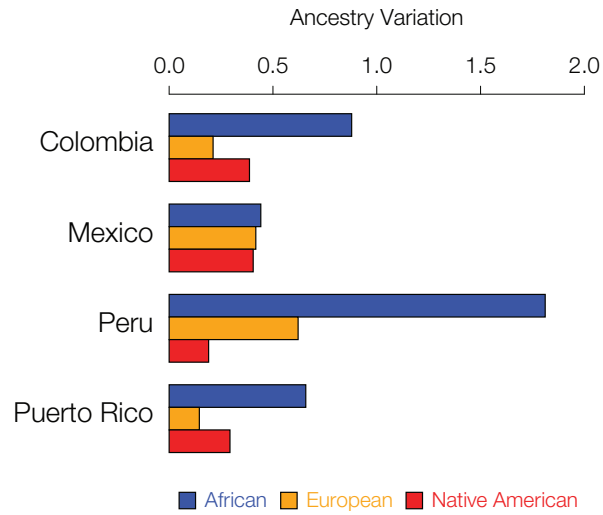

**Figure 6. Inter-individual ancestry variance for the four admixed Latin American populations analyzed here.** Variance among individuals for the African (blue), European (orange), and Native American (red) ancestry fractions within each population are shown.
